# Supplementary figures and images for: Efficacy of bifenthrin-impregnated bednets against Anopheles funestus and pyrethroid-resistant Anopheles gambiae in North Cameroon
Source: Springer Nature journal article supplement (doi:10.1186/1475-2875-5-77), 2006-09-11

Number of anophelines per 10 nights

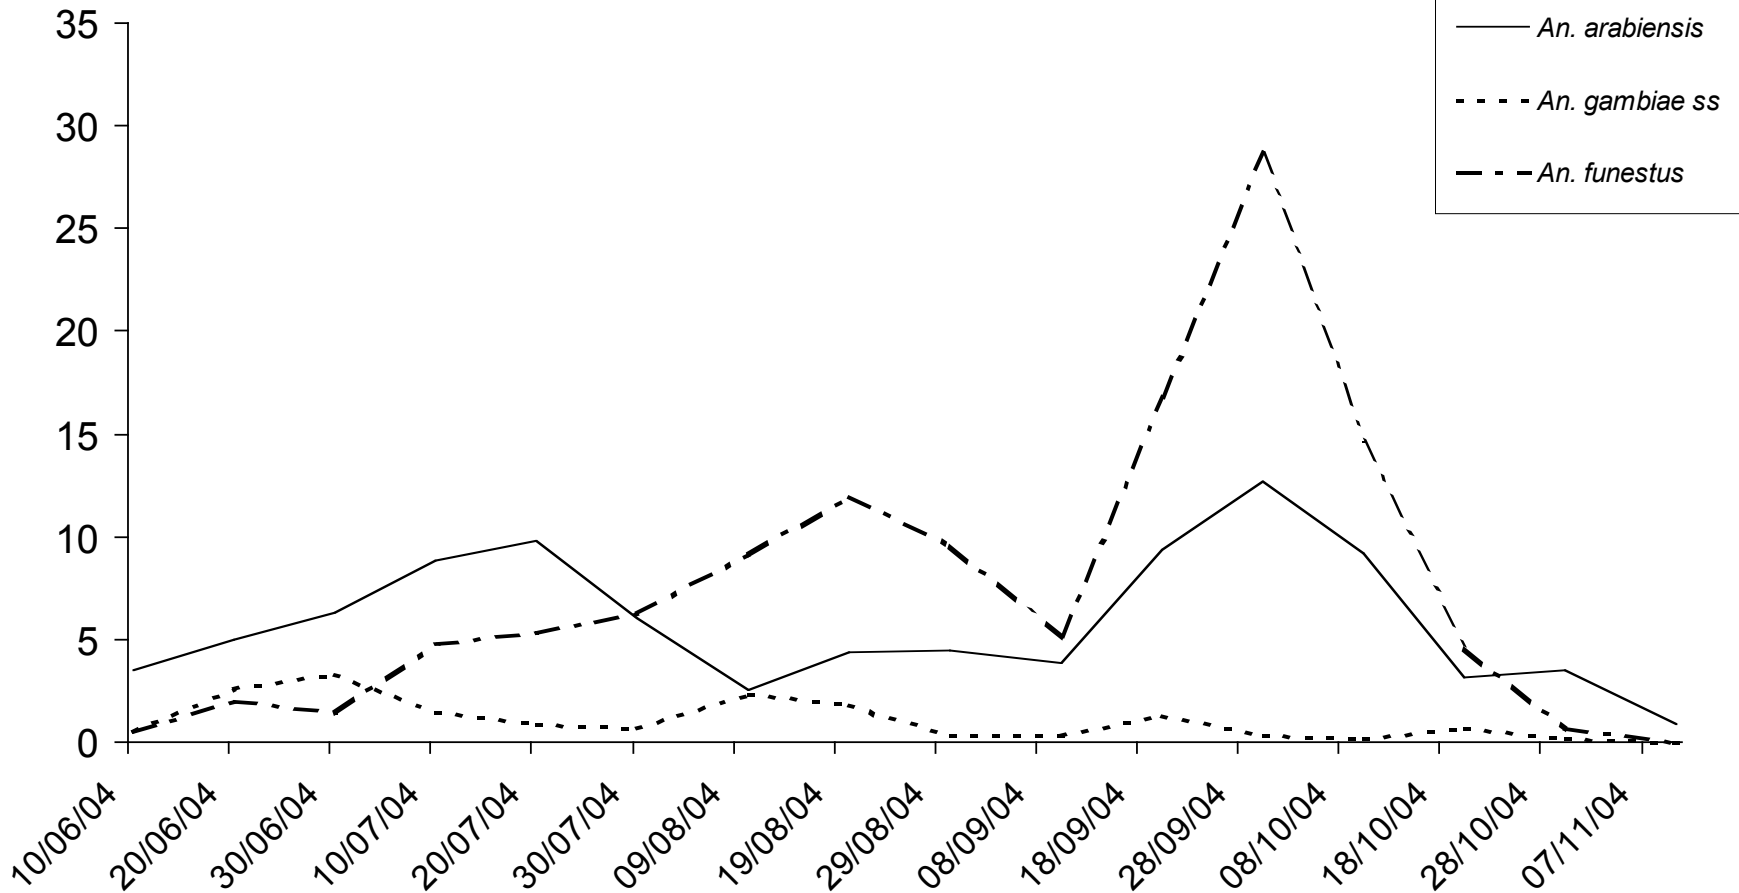

Supplement: 12936_2006_255_MOESM1_ESM.pdf [file 12936_2006_255_MOESM1_ESM.pdf]
